# Supplementary material for: Meta-Analysis and Validation of a Colorectal Cancer Risk Prediction Model Using Deep Sequenced Fecal Metagenomes
Source: MDPI journal article supplement (doi:10.3390/cancers14174214), 2022-08-30
Supplement: s1 [file s1]

# Supporting information

Figure S1. PRISMA chart of the search strategy

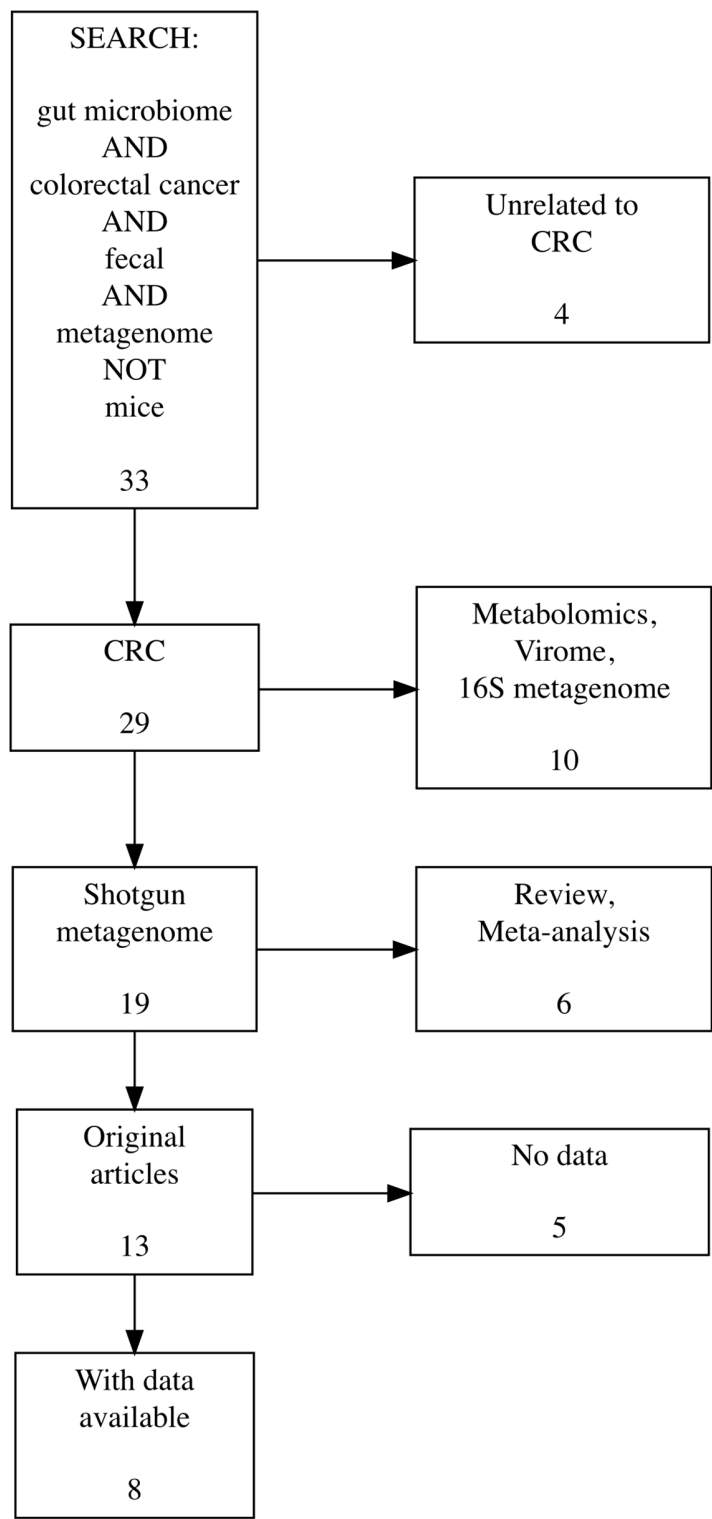

**Figure S2. Epidemiological description of the included metagenomic datasets.** a) Age distribution of participants. b) Sex distribution of participants. c) BMI distribution of participants.

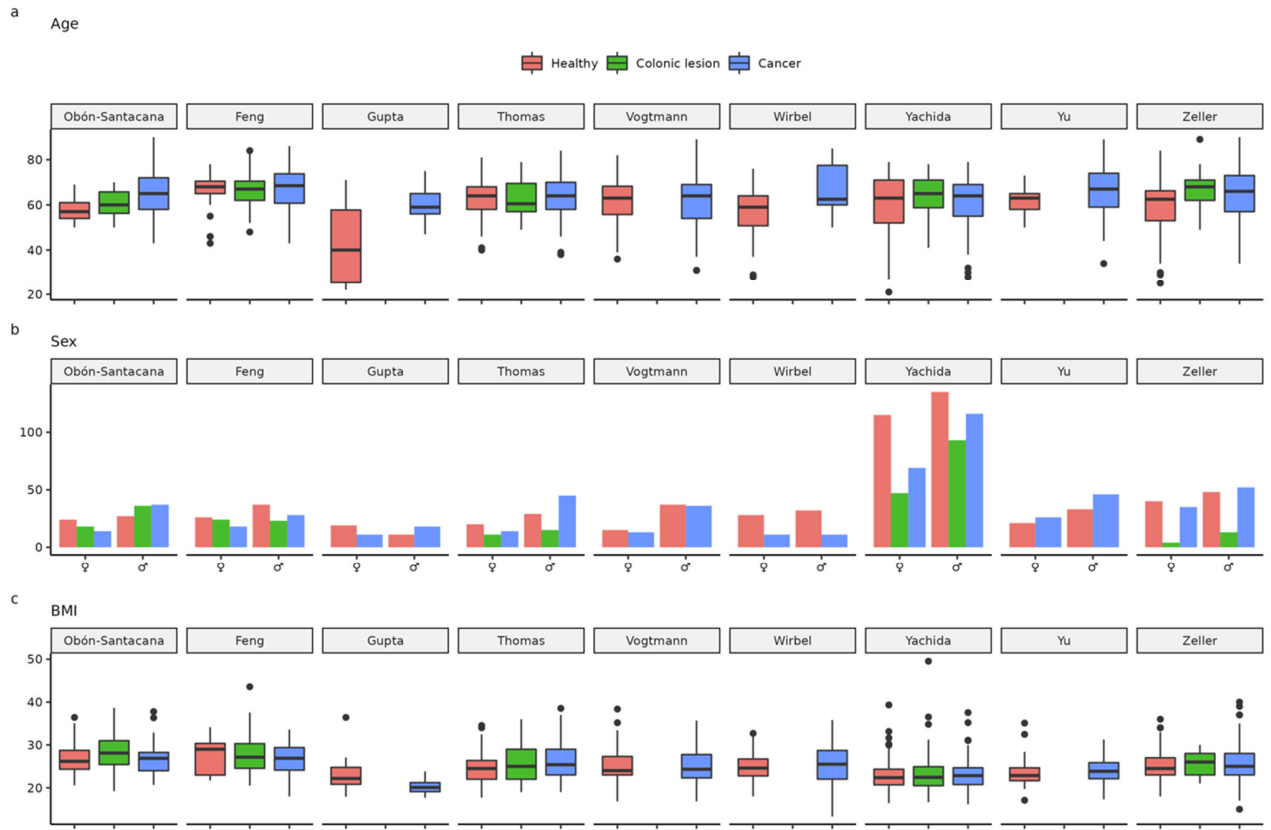

**Figure S3. Beta diversity metrics (based on Euclidean distances of ILR-transformed relative abundance counts) of the included metagenomic datasets by health status.**

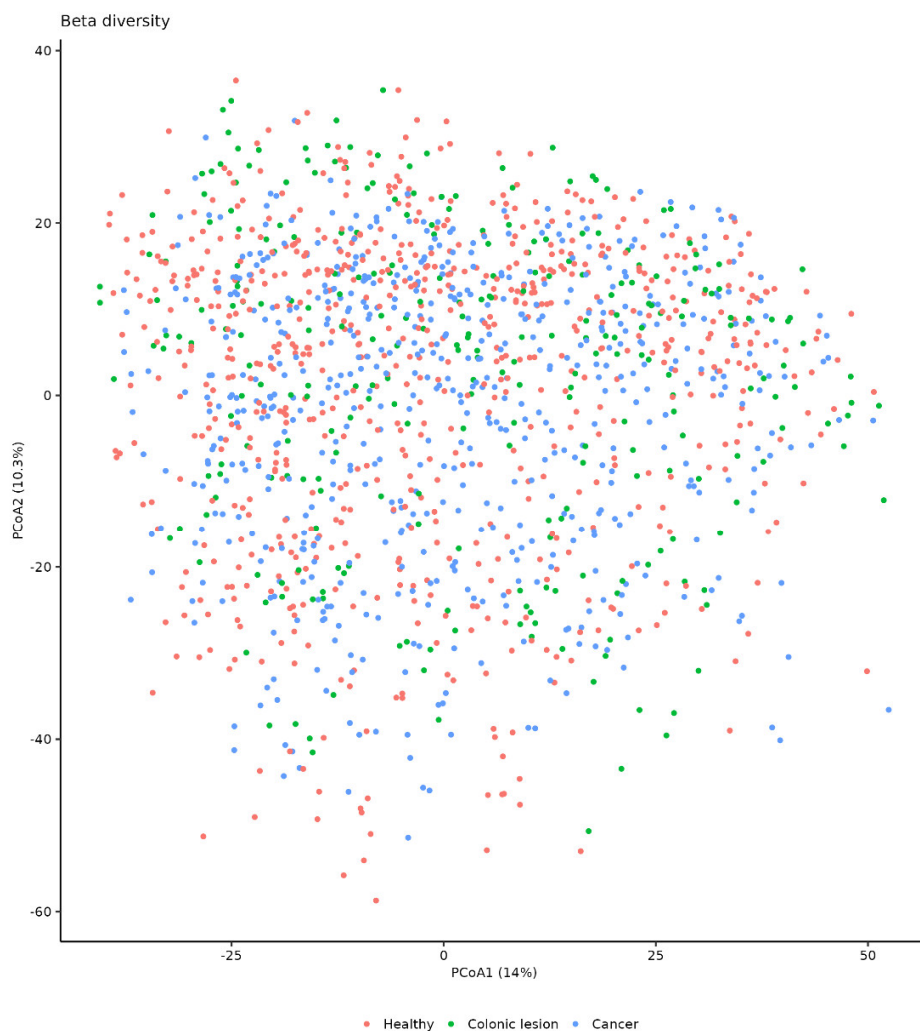

**Figure S4. Microbiome diversity statistics of the included metagenomic datasets by age. a) Alpha diversity metrics (Faith's index). b) Beta diversity metrics (based on Euclidean distances of ILR-transformed relative abundance counts). Age median value: 63 years (<63, ≥63).**

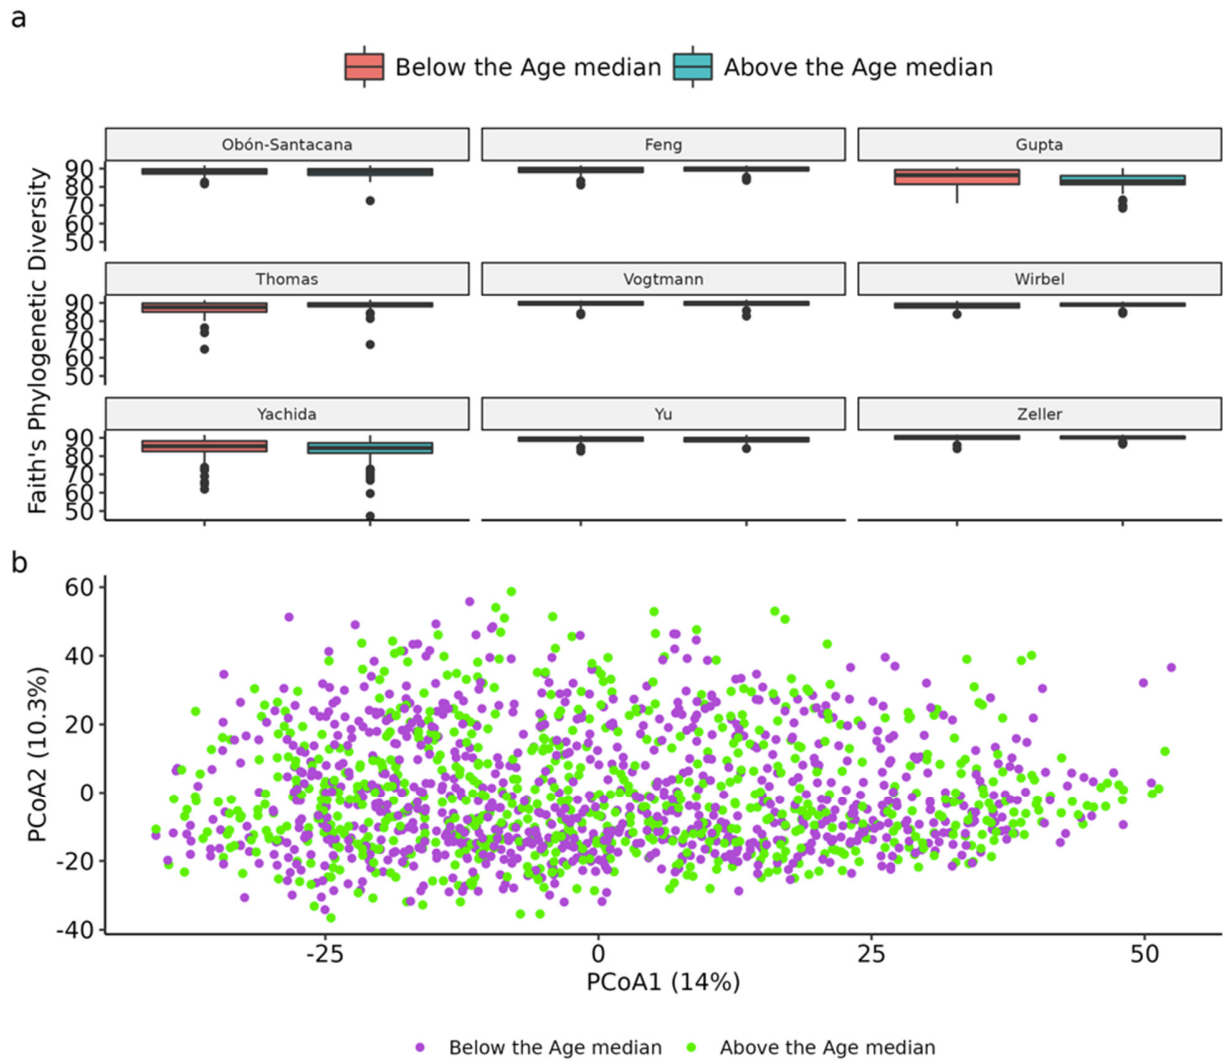

**Figure S5. Microbiome diversity statistics of the included metagenomic datasets by sex. a) Alpha diversity metrics (Faith's index). b) Beta diversity metrics (based on Euclidean distances of ILR-transformed relative abundance counts).**

a

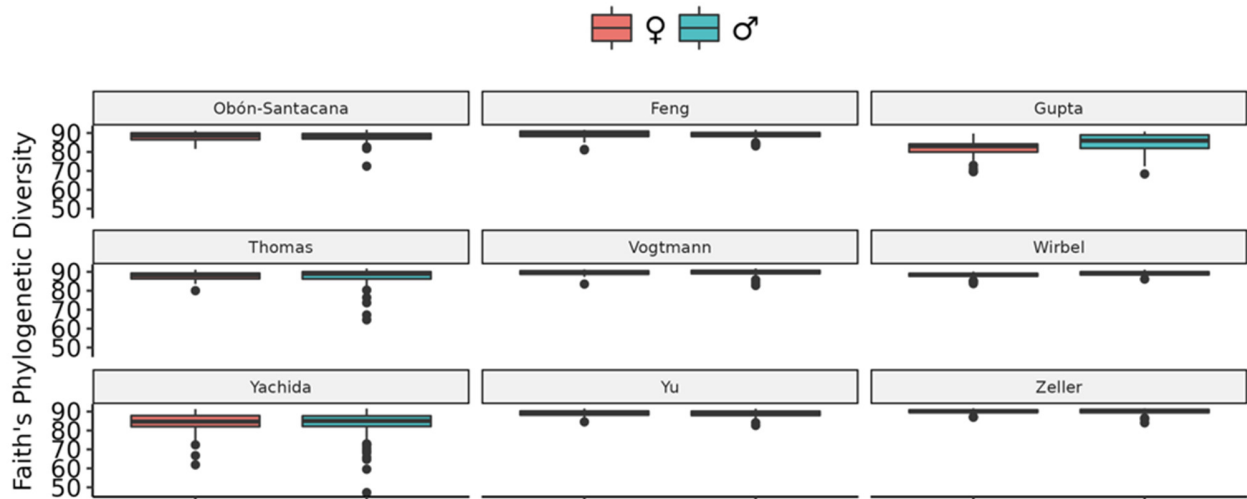

b

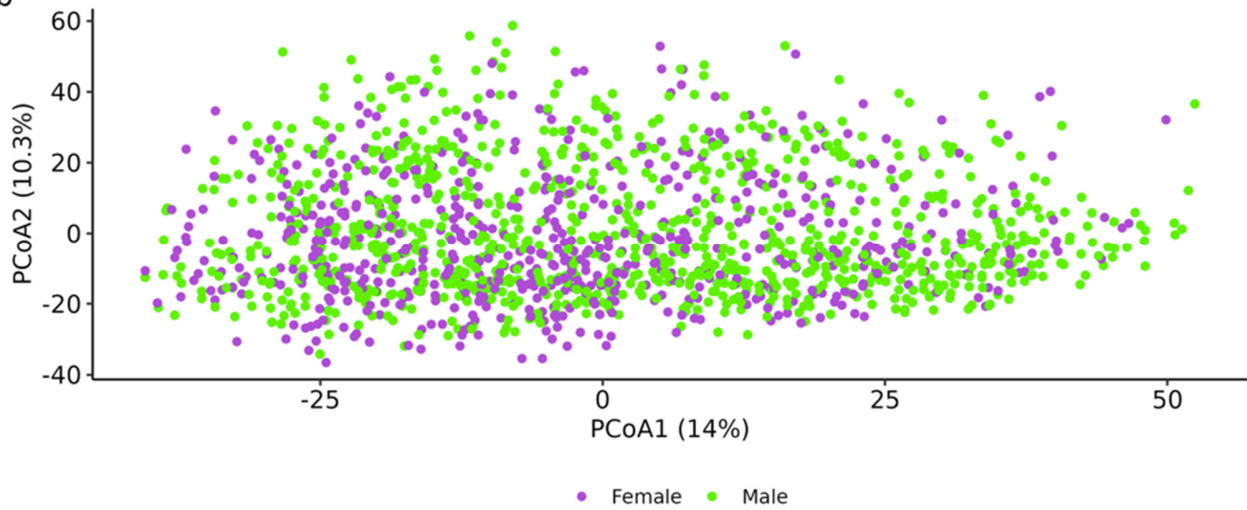

**Figure S6 Microbiome diversity statistics of the included metagenomic datasets by body mass index (BMI).** a) Alpha diversity metrics (Faith's index). b) Beta diversity metrics (based on Euclidean distances of ILR-transformed relative abundance counts). BMI median value: 24 (<24, ≥24).

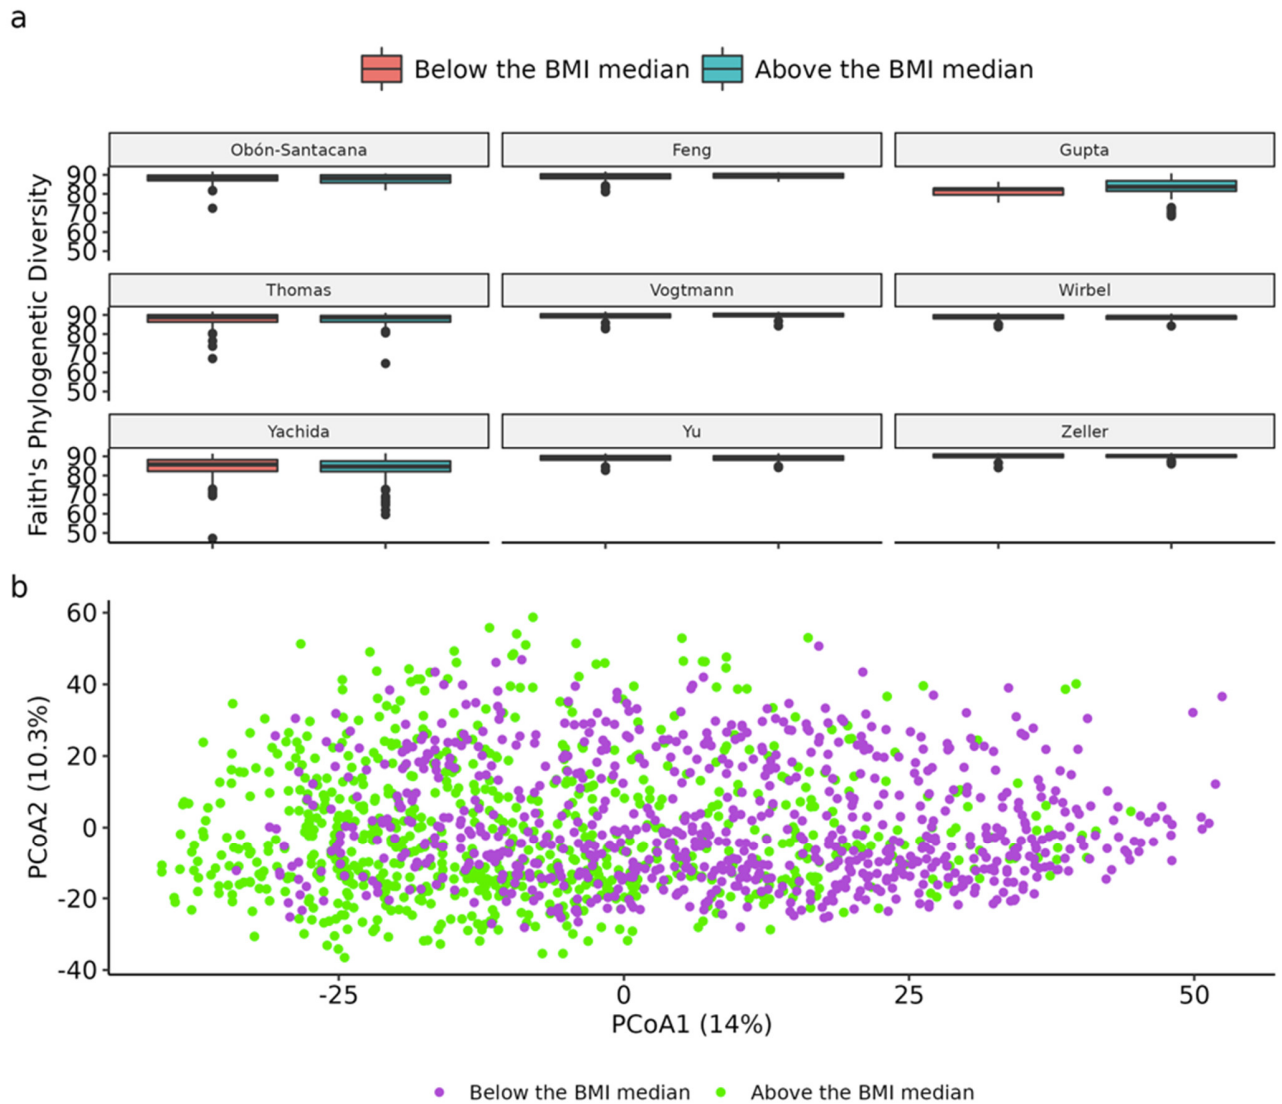

**Figure S7. Receiver operating characteristic curve representing the CRC-trained model to predict the presence of precancerous lesions**

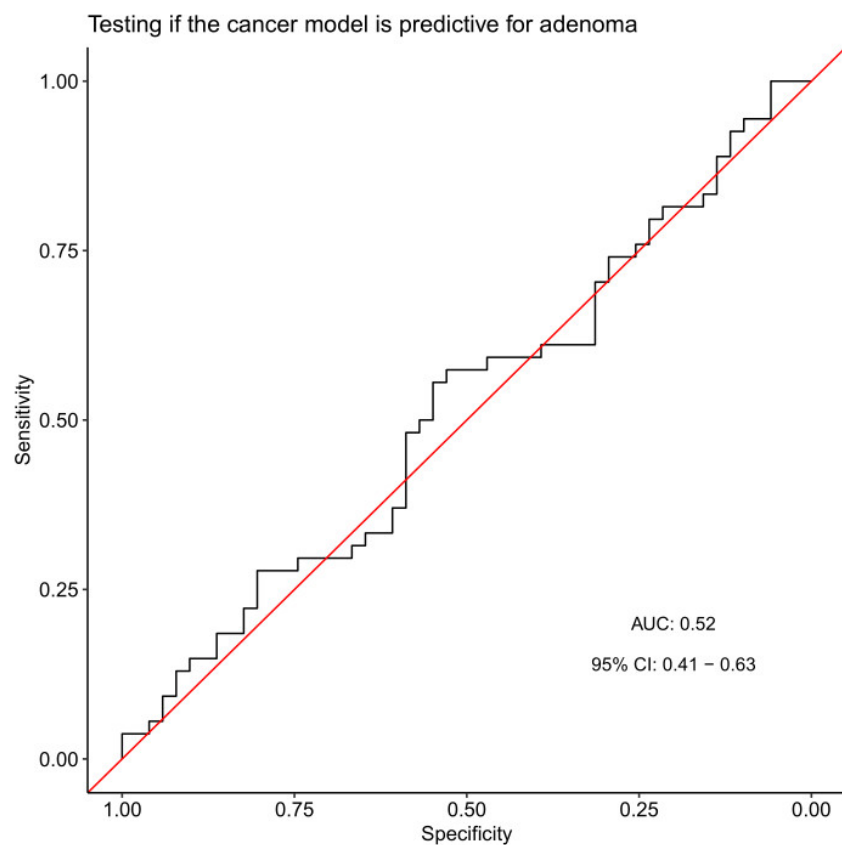

**Figure S8. Summary of the LASSO precancerous lesion trained model.** a) Log-transformed relative abundance counts of control-enriched (green) and precancerous lesion-enriched (purple) species selected by the model. b) Density plot of model prediction, colored by the status of the samples. c) Receiver operating characteristic curve representing the performance of the model to predict the presence of precancerous lesions considering all species as candidates.

\*: statistically significant (p-value < 0.05) based on Wilcoxon rank sum test in *aldex.test*

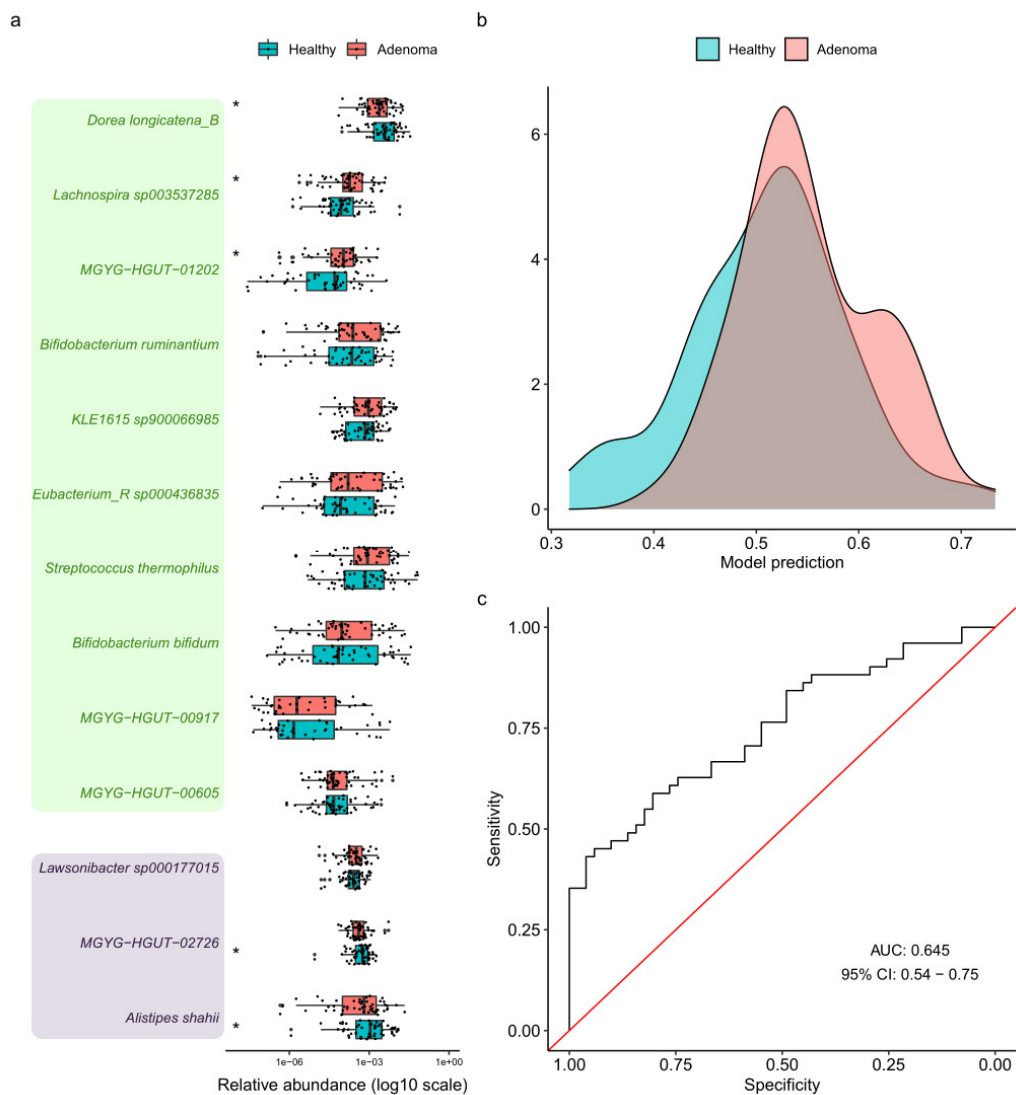



**Figure S9. Summary of the LASSO model considering both CRC and precancerous lesion samples and all species.** a) Log-transformed relative abundance counts of control-enriched (green) and CRC+precancerous lesion enriched (purple) species selected by the model. b) Density plot of model prediction, colored by the status of the samples. c) Receiver operating characteristic curve representing the performance of the model to predict the presence of CRC and precancerous lesions considering all species as candidates. \*: statistically significant (p-value < 0.05) based on Wilcoxon rank sum test in *aldex.test*

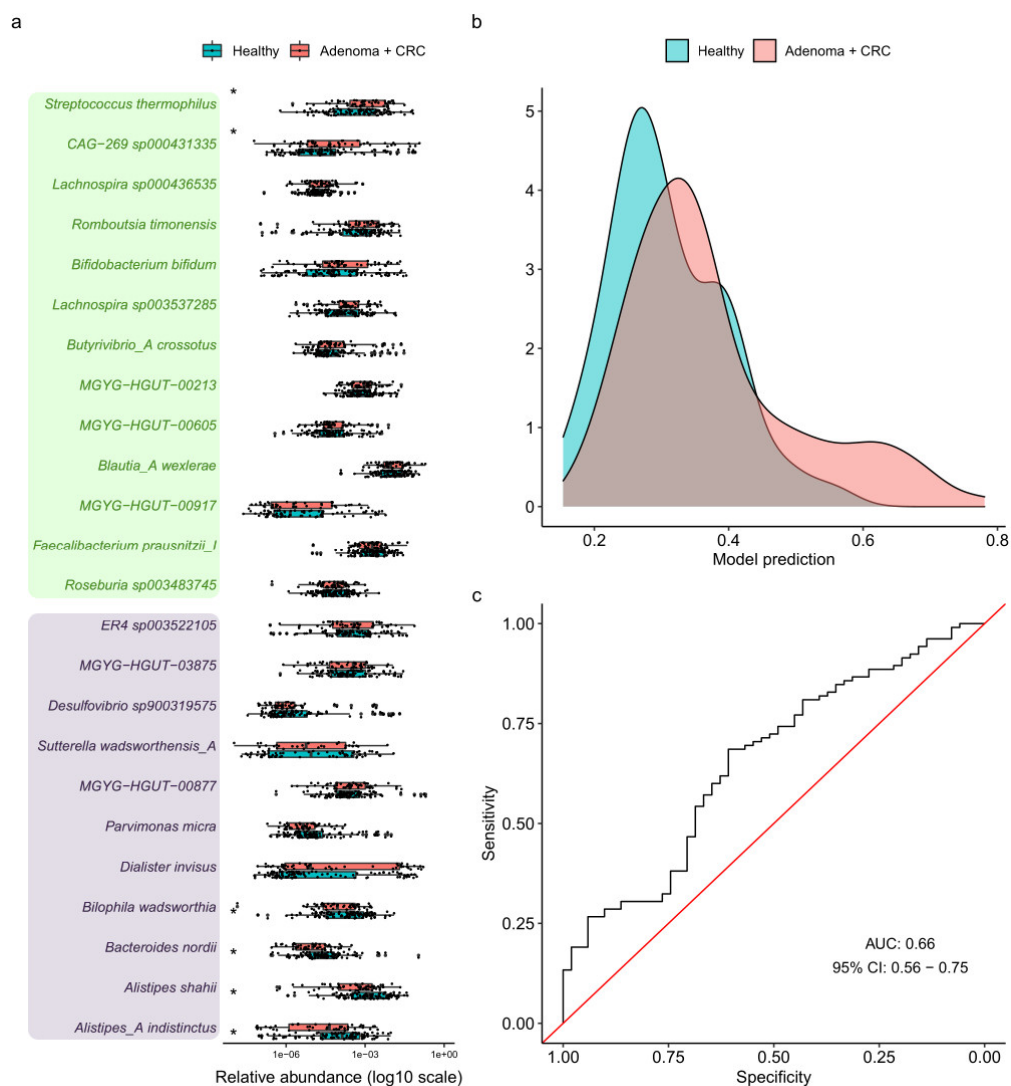

**Figure S10. Receiver operating characteristic curve representing the precancerous lesions trained model to predict the presence of CRC in the analysis of eggNOG orthologous groups.**

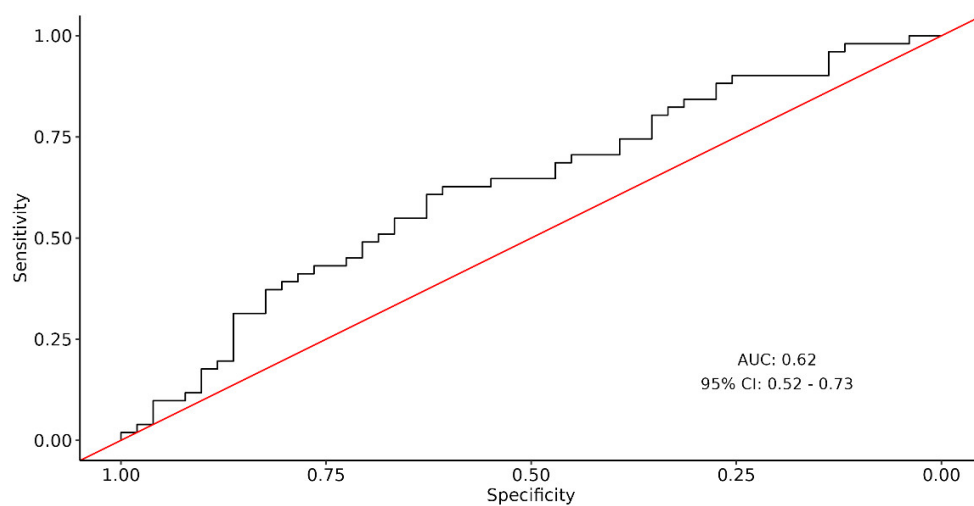

**Table S1. Quality control for our 156 COLSCREEN samples.** Comparison of the original and high-quality microbial paired-end reads, as well as percentages of read pairs excluded due to duplication or quality and adapter trimming.

| <b>Sample</b> | <b>Microbiological reads</b> | <b>High-quality reads</b> | <b>%deduplicated</b> | <b>%trimmed</b> |
|---------------|------------------------------|---------------------------|----------------------|-----------------|
| AL3936        | 137807640                    | 130385056                 | 0.05                 | 5.34            |
| AL3937        | 32132994                     | 28949268                  | 3.12                 | 7.01            |
| AL3938        | 116244474                    | 110262862                 | 0.05                 | 5.10            |
| AL3939        | 112309536                    | 105909072                 | 0.04                 | 5.66            |
| AL3941        | 35416308                     | 30577024                  | 2.94                 | 11.05           |
| AL3942        | 36525444                     | 32121802                  | 3.10                 | 9.25            |
| AL3943        | 173183254                    | 164643138                 | 0.04                 | 4.89            |
| AL3944        | 129632482                    | 122562568                 | 0.04                 | 5.41            |
| AL3945        | 30127354                     | 26587002                  | 3.61                 | 8.45            |
| AL3946        | 29971510                     | 26600940                  | 3.54                 | 7.99            |
| AL3947        | 153180552                    | 145616518                 | 0.03                 | 4.90            |
| AL3948        | 94936560                     | 89717148                  | 0.04                 | 5.46            |
| AL3949        | 44379690                     | 41680280                  | 0.05                 | 6.04            |
| AL3950        | 155630786                    | 147701524                 | 0.05                 | 5.05            |
| AL3951        | 149547548                    | 142064718                 | 0.05                 | 4.96            |
| AL3952        | 29865278                     | 26208538                  | 3.36                 | 9.19            |
| AL3953        | 155187520                    | 146917344                 | 0.05                 | 5.28            |
| AL3954        | 148838472                    | 141130206                 | 0.05                 | 5.13            |
| AL3955        | 131602532                    | 124281592                 | 0.05                 | 5.52            |
| AL3956        | 119522738                    | 112726596                 | 0.04                 | 5.64            |
| AL3957        | 29192338                     | 26921156                  | 0.04                 | 7.74            |
| AL3958        | 29059372                     | 27237392                  | 0.05                 | 6.23            |
| AL3959        | 30756680                     | 27504364                  | 3.47                 | 7.36            |
| AL3960        | 30600070                     | 27692380                  | 3.11                 | 6.60            |
| AL3961        | 29780872                     | 27348614                  | 0.05                 | 8.12            |
| AL3962        | 134107242                    | 127562054                 | 0.05                 | 4.83            |
| AL3963        | 167411282                    | 158991970                 | 0.05                 | 4.98            |
| AL3964        | 94684244                     | 86587566                  | 3.08                 | 5.65            |
| AL3965        | 133713908                    | 125825090                 | 0.05                 | 5.86            |
| AL3966        | 116984080                    | 107793146                 | 2.67                 | 5.33            |
| AL3967        | 115875504                    | 106261662                 | 3.16                 | 5.30            |
| AL3968        | 31187232                     | 27919578                  | 3.25                 | 7.47            |
| AL3969        | 118342352                    | 112023164                 | 0.05                 | 5.29            |
| AL3970        | 118551076                    | 112517712                 | 0.03                 | 5.06            |
| AL3971        | 123738728                    | 117279674                 | 0.06                 | 5.17            |
| AL3972        | 132033844                    | 125052722                 | 0.05                 | 5.24            |

|        |           |           |      |       |
|--------|-----------|-----------|------|-------|
| AL3973 | 118066474 | 111019206 | 0.02 | 5.95  |
| AL3974 | 90101028  | 82347182  | 3.45 | 5.34  |
| AL3975 | 35941418  | 31378398  | 2.59 | 10.38 |
| AL3976 | 101065154 | 95421582  | 0.05 | 5.54  |
| AL3977 | 28686052  | 26671554  | 0.06 | 6.97  |
| AL3978 | 172682872 | 162672388 | 0.05 | 5.75  |
| AL3979 | 127728836 | 121080278 | 0.04 | 5.16  |
| AL3980 | 144391082 | 136630046 | 0.05 | 5.33  |
| AL3981 | 118854808 | 112260370 | 0.04 | 5.51  |
| AL3982 | 133009574 | 125902564 | 0.04 | 5.30  |
| AL3983 | 107280800 | 98545626  | 2.85 | 5.44  |
| AL3984 | 124896186 | 118063494 | 0.04 | 5.43  |
| AL3985 | 33104848  | 30885658  | 0.05 | 6.66  |
| AL3986 | 107197440 | 101123954 | 0.04 | 5.63  |
| AL3987 | 30283018  | 27178696  | 3.33 | 7.16  |
| AL3988 | 100431040 | 92122742  | 2.84 | 5.59  |
| AL3989 | 118785176 | 112198364 | 0.04 | 5.50  |
| AL3990 | 33386680  | 31046184  | 0.05 | 6.96  |
| AL3991 | 30041974  | 26846790  | 2.98 | 7.89  |
| AL3992 | 37443762  | 34809862  | 0.05 | 6.99  |
| AL3993 | 33731150  | 30197032  | 3.17 | 7.54  |
| AL3994 | 31988038  | 28896652  | 2.90 | 6.96  |
| AL3995 | 32001504  | 29654910  | 0.04 | 7.29  |
| AL3996 | 30020518  | 27716642  | 0.05 | 7.63  |
| AL3997 | 29887790  | 26858190  | 3.06 | 7.30  |
| AL3998 | 87720900  | 80362548  | 2.79 | 5.76  |
| AL3999 | 92834350  | 84224352  | 3.21 | 6.26  |
| AL4000 | 36227656  | 33343526  | 0.05 | 7.92  |
| AL4001 | 39006180  | 34900620  | 3.51 | 7.27  |
| AL4002 | 34108148  | 30677586  | 3.41 | 6.88  |
| AL4003 | 29059002  | 26823874  | 0.05 | 7.65  |
| AL4004 | 95958410  | 90723462  | 0.05 | 5.41  |
| AL4005 | 30625786  | 28247258  | 0.04 | 7.73  |
| AL4006 | 33203256  | 29830902  | 3.63 | 6.77  |
| AL4007 | 35829114  | 32347982  | 3.65 | 6.29  |
| AL4008 | 40284218  | 36460120  | 3.64 | 6.08  |
| AL4009 | 36438206  | 33575524  | 0.05 | 7.81  |
| AL4010 | 106245442 | 100296052 | 0.05 | 5.55  |
| AL4011 | 32382424  | 28585982  | 3.57 | 8.45  |
| AL4012 | 100130168 | 91499656  | 3.24 | 5.56  |
| AL4013 | 32389742  | 29332026  | 3.19 | 6.46  |
| AL4014 | 30341970  | 27090298  | 3.43 | 7.55  |
| AL4015 | 31674774  | 27944114  | 3.51 | 8.57  |

|        |           |           |      |      |
|--------|-----------|-----------|------|------|
| AL4016 | 54293154  | 50882104  | 0.05 | 6.24 |
| AL4017 | 54669778  | 51436142  | 0.05 | 5.87 |
| AL4018 | 44068616  | 40941006  | 0.05 | 7.05 |
| AL4019 | 86110594  | 80928636  | 0.05 | 5.97 |
| AL4020 | 31144764  | 27172228  | 3.53 | 9.57 |
| AL4021 | 30020926  | 26531128  | 3.53 | 8.39 |
| AL4022 | 30331004  | 26790910  | 3.72 | 8.26 |
| AL4023 | 35354818  | 32607326  | 0.05 | 7.72 |
| AL4024 | 35550064  | 31714118  | 3.05 | 7.99 |
| AL4025 | 53888168  | 50315258  | 0.05 | 6.59 |
| AL4026 | 91113432  | 85028846  | 0.05 | 6.64 |
| AL4027 | 36555904  | 32477984  | 3.15 | 8.26 |
| AL4028 | 35196730  | 31490354  | 3.26 | 7.52 |
| AL4029 | 35884498  | 32274882  | 3.39 | 6.91 |
| AL4030 | 40191780  | 37296710  | 0.05 | 7.16 |
| AL4031 | 43508306  | 40521402  | 0.05 | 6.82 |
| AL4032 | 44470096  | 40084828  | 3.27 | 6.81 |
| AL4033 | 38614780  | 34870124  | 3.20 | 6.71 |
| AL4034 | 70561786  | 66300300  | 0.04 | 6.00 |
| AL4035 | 31936526  | 28410442  | 2.96 | 8.33 |
| AL4036 | 34644488  | 32139988  | 0.05 | 7.18 |
| AL4037 | 32124472  | 28559660  | 2.70 | 8.63 |
| AL4038 | 38384538  | 34457260  | 3.12 | 7.34 |
| AL4039 | 34893322  | 31228404  | 3.32 | 7.43 |
| AL4040 | 39679232  | 36822692  | 0.04 | 7.16 |
| AL4041 | 53851648  | 50350632  | 0.05 | 6.45 |
| AL4042 | 34971506  | 31286978  | 2.91 | 7.85 |
| AL4043 | 32267220  | 29463770  | 0.05 | 8.65 |
| AL4044 | 29862710  | 26520896  | 3.02 | 8.42 |
| AL4045 | 31911920  | 28237536  | 3.14 | 8.64 |
| AL4046 | 33535138  | 31142942  | 0.05 | 7.09 |
| AL4047 | 43173862  | 38853088  | 3.92 | 6.34 |
| AL4048 | 48311318  | 43965720  | 2.29 | 6.86 |
| AL4049 | 41774472  | 37244892  | 3.27 | 7.82 |
| AL4050 | 41289386  | 37373082  | 3.78 | 5.93 |
| AL4051 | 39056812  | 36254166  | 0.05 | 7.13 |
| AL4053 | 41987652  | 38914320  | 0.04 | 7.28 |
| AL4054 | 35443942  | 31692712  | 2.93 | 7.88 |
| AL4055 | 35596278  | 31688046  | 3.22 | 8.02 |
| AL4056 | 36494028  | 33494606  | 0.05 | 8.17 |
| AL4057 | 47077818  | 42684832  | 3.20 | 6.34 |
| AL4058 | 302212934 | 287890190 | 0.05 | 4.69 |
| AL4059 | 42709396  | 38469566  | 3.19 | 6.96 |

|        |            |            |      |      |
|--------|------------|------------|------|------|
| AL4060 | 41784252   | 36966762   | 3.19 | 8.62 |
| AL4061 | 39118816   | 36622546   | 0.06 | 6.33 |
| AL4062 | 39599020   | 35846782   | 2.88 | 6.79 |
| AL4063 | 39038374   | 35885604   | 0.05 | 8.03 |
| AL4064 | 1125476974 | 1051116174 | 0.07 | 6.55 |
| AL4065 | 47338180   | 43876110   | 0.05 | 7.27 |
| AL4066 | 42921990   | 38490450   | 3.01 | 7.54 |
| AL4067 | 43903990   | 41010182   | 0.05 | 6.55 |
| AL4068 | 41896332   | 38750650   | 0.06 | 7.45 |
| AL4069 | 45717170   | 42127050   | 0.05 | 7.81 |
| AL4070 | 45940712   | 41041760   | 3.14 | 7.76 |
| AL4071 | 52631110   | 48971764   | 0.05 | 6.91 |
| AL4072 | 43137226   | 39758256   | 0.04 | 7.79 |
| AL4073 | 2947937736 | 2749988242 | 0.09 | 6.63 |
| AL4074 | 49244426   | 44455586   | 2.88 | 7.05 |
| AL4075 | 46725310   | 43375632   | 0.05 | 7.13 |
| AL4076 | 39362420   | 36498372   | 0.05 | 7.23 |
| AL4077 | 38600364   | 35688364   | 0.05 | 7.50 |
| AL4078 | 46367270   | 43137208   | 0.05 | 6.92 |
| AL4079 | 40686892   | 37533144   | 0.05 | 7.71 |
| AL4080 | 44195718   | 39191994   | 3.01 | 8.57 |
| AL4081 | 64619284   | 60272194   | 0.05 | 6.68 |
| AL4082 | 71013766   | 66289598   | 0.06 | 6.60 |
| AL4083 | 31698982   | 29505854   | 0.06 | 6.87 |
| AL4084 | 84621300   | 75558410   | 2.95 | 8.00 |
| AL4086 | 46819138   | 43199158   | 0.05 | 7.69 |
| AL4087 | 42681434   | 39376352   | 0.05 | 7.70 |
| AL4088 | 54539776   | 50595698   | 0.05 | 7.19 |
| AL4089 | 43757436   | 40364166   | 0.06 | 7.70 |
| AL4090 | 54095394   | 49049762   | 2.90 | 6.62 |
| AL4091 | 46816712   | 43234668   | 0.05 | 7.61 |
| AL4092 | 53819896   | 48636674   | 3.59 | 6.27 |
| AL4093 | 45069952   | 41306620   | 0.05 | 8.31 |
| AL4095 | 39516740   | 36084140   | 0.04 | 8.65 |

**Table S2. Detailed description of our 156 COLSCREEN samples.**

| <b>sampleID</b> | <b>cohort</b> | <b>status</b> | <b>age</b> | <b>sex</b> | <b>bmi</b> | <b>sampling to colonoscopy</b> |
|-----------------|---------------|---------------|------------|------------|------------|--------------------------------|
| AL3936          | screening     | cancer        | 57         | male       | 32         | before                         |
| AL3937          | screening     | cancer        | 62         | male       | 26         | before                         |
| AL3938          | screening     | cancer        | 55         | female     | 27         | before                         |
| AL3939          | screening     | cancer        | 57         | female     | 27         | before                         |
| AL3941          | hospital      | cancer        | 58         | female     | 28         | after                          |
| AL3942          | screening     | cancer        | 68         | male       | 36         | before                         |
| AL3943          | hospital      | cancer        | 75         | female     | 33         | after                          |
| AL3944          | screening     | cancer        | 58         | male       | 29         | before                         |
| AL3945          | screening     | cancer        | 60         | male       | 26         | before                         |
| AL3946          | hospital      | cancer        | 60         | male       | 29         | after                          |
| AL3947          | screening     | cancer        | 62         | male       | 29         | before                         |
| AL3948          | hospital      | cancer        | 66         | male       | 27         | after                          |
| AL3949          | hospital      | cancer        | 76         | male       | 27         | after                          |
| AL3950          | hospital      | cancer        | 65         | female     | 24         | after                          |
| AL3951          | hospital      | cancer        | 68         | male       | 23         | after                          |
| AL3952          | hospital      | cancer        | 56         | male       | 33         | after                          |
| AL3953          | screening     | adenoma       | 52         | female     | 28         | before                         |
| AL3954          | screening     | adenoma       | 70         | male       | 26         | before                         |
| AL3955          | screening     | adenoma       | 59         | male       | 30         | before                         |
| AL3956          | screening     | adenoma       | 53         | male       | 26         | before                         |
| AL3957          | screening     | adenoma       | 66         | female     | 28         | before                         |
| AL3958          | screening     | adenoma       | 69         | female     | 32         | before                         |
| AL3959          | screening     | adenoma       | 59         | male       | 25         | before                         |
| AL3960          | screening     | adenoma       | 59         | male       | 31         | before                         |
| AL3961          | screening     | adenoma       | 53         | male       | 31         | before                         |
| AL3962          | screening     | adenoma       | 60         | male       | 25         | before                         |
| AL3963          | screening     | adenoma       | 52         | female     | 24         | before                         |
| AL3964          | screening     | adenoma       | 68         | male       | 30         | before                         |
| AL3965          | screening     | adenoma       | 67         | female     | 25         | before                         |
| AL3966          | screening     | neg           | 55         | female     | 23         | before                         |
| AL3967          | screening     | neg           | 64         | male       | 28         | before                         |
| AL3968          | screening     | neg           | 52         | male       | 33         | before                         |
| AL3969          | screening     | neg           | 69         | male       | 27         | before                         |
| AL3970          | screening     | neg           | 53         | female     | 26         | before                         |
| AL3971          | screening     | neg           | 58         | female     | 29         | before                         |
| AL3972          | screening     | neg           | 65         | male       | 35         | before                         |
| AL3973          | screening     | neg           | 56         | male       | 27         | before                         |
| AL3974          | screening     | neg           | 52         | female     | 24         | before                         |
| AL3975          | screening     | neg           | 59         | male       | 24         | before                         |

|        |           |         |    |        |    |        |
|--------|-----------|---------|----|--------|----|--------|
| AL3976 | screening | neg     | 59 | male   | 36 | before |
| AL3977 | screening | neg     | 51 | male   | 22 | before |
| AL3978 | screening | neg     | 62 | male   | 27 | before |
| AL3979 | screening | neg     | 58 | female | 21 | before |
| AL3980 | screening | adenoma | 66 | male   | 25 | before |
| AL3981 | screening | neg     | 69 | female | 28 | before |
| AL3982 | screening | adenoma | 69 | male   | 38 | before |
| AL3983 | screening | adenoma | 59 | male   | 30 | before |
| AL3984 | screening | neg     | 59 | male   | 30 | before |
| AL3985 | screening | adenoma | 66 | male   | 32 | before |
| AL3986 | hospital  | cancer  | 60 | female | 31 | after  |
| AL3987 | screening | adenoma | 61 | female | 29 | before |
| AL3988 | screening | cancer  | 64 | male   | 24 | before |
| AL3989 | screening | adenoma | 63 | male   | 28 | before |
| AL3990 | screening | neg     | 61 | female | 31 | before |
| AL3991 | screening | adenoma | 67 | male   | 29 | before |
| AL3992 | screening | cancer  | 66 | male   | 27 | before |
| AL3993 | screening | neg     | 65 | male   | 32 | before |
| AL3994 | screening | cancer  | 66 | male   | 23 | before |
| AL3995 | screening | adenoma | 57 | male   | 33 | before |
| AL3996 | screening | adenoma | 65 | male   | 37 | before |
| AL3997 | screening | adenoma | 55 | female | 29 | before |
| AL3998 | screening | cancer  | 61 | female | 24 | before |
| AL3999 | screening | neg     | 66 | male   | 28 | before |
| AL4000 | screening | adenoma | 64 | female | 38 | before |
| AL4001 | screening | adenoma | 56 | male   | 27 | before |
| AL4002 | hospital  | cancer  | 73 | male   | 22 | after  |
| AL4003 | screening | adenoma | 57 | male   | 28 | before |
| AL4004 | screening | adenoma | 62 | male   | 26 | before |
| AL4005 | screening | adenoma | 51 | female | 21 | before |
| AL4006 | screening | adenoma | 53 | female | 38 | before |
| AL4007 | screening | neg     | 65 | male   | 28 | before |
| AL4008 | screening | neg     | 65 | male   | 25 | before |
| AL4009 | screening | adenoma | 50 | male   | 28 | before |
| AL4010 | screening | adenoma | 61 | female | 39 | before |
| AL4011 | screening | adenoma | 58 | male   | 26 | before |
| AL4012 | screening | adenoma | 68 | male   | 33 | before |
| AL4013 | screening | adenoma | 59 | male   | 37 | before |
| AL4014 | screening | adenoma | 60 | female | 21 | before |
| AL4015 | screening | adenoma | 65 | female | 27 | before |
| AL4016 | screening | adenoma | 50 | male   | 30 | before |
| AL4017 | screening | adenoma | 67 | female | 38 | before |
| AL4018 | screening | adenoma | 51 | male   | 21 | before |



|         |           |         |    |        |    |        |
|---------|-----------|---------|----|--------|----|--------|
| AL4019  | screening | adenoma | 59 | male   | 24 | before |
| AL4020  | screening | adenoma | 53 | male   | 25 | before |
| AL4021  | screening | adenoma | 50 | male   | 37 | before |
| AL4022  | screening | adenoma | 67 | male   | 30 | before |
| AL4023  | screening | adenoma | 64 | male   | 21 | before |
| AL4024  | hospital  | cancer  | 51 | male   | 27 | after  |
| AL4025  | hospital  | cancer  | 68 | male   | 27 | after  |
| AL40262 | hospital  | cancer  | 52 | male   | 23 | after  |
| AL4027  | hospital  | cancer  | 73 | male   | 26 | after  |
| AL4028  | hospital  | cancer  | 77 | male   | 29 | after  |
| AL4029  | hospital  | cancer  | 90 | female | 22 | after  |
| AL4030  | screening | cancer  | 67 | male   | 24 | before |
| AL4031  | hospital  | cancer  | 76 | female | 27 | after  |
| AL4032  | hospital  | cancer  | 69 | male   | 32 | after  |
| AL4033  | screening | cancer  | 63 | male   | 27 | before |
| AL4034  | hospital  | cancer  | 63 | male   | 27 | after  |
| AL4035  | hospital  | cancer  | 71 | female | 29 | after  |
| AL4036  | screening | neg     | 69 | male   | 29 | before |
| AL4037  | screening | neg     | 57 | female | 29 | before |
| AL4038  | hospital  | cancer  | 68 | male   | 24 | after  |
| AL4039  | screening | neg     | 50 | male   | 32 | before |
| AL4040  | screening | neg     | 57 | male   | 25 | before |
| AL4041  | screening | adenoma | 68 | male   | 27 | before |
| AL4042  | screening | adenoma | 63 | male   | 27 | before |
| AL4043  | screening | adenoma | 64 | female | 25 | before |
| AL4044  | screening | adenoma | 52 | male   | 28 | before |
| AL4045  | hospital  | cancer  | 66 | female | 38 | after  |
| AL4046  | hospital  | cancer  | 57 | male   | 27 | after  |
| AL4047  | screening | neg     | 52 | male   | 25 | before |
| AL4048  | screening | neg     | 65 | female | 25 | before |
| AL4049  | screening | adenoma | 58 | female | 39 | before |
| AL4050  | screening | adenoma | 60 | male   | 30 | before |
| AL4051  | hospital  | cancer  | 75 | male   | 25 | after  |
| AL4053  | hospital  | cancer  | 73 | male   | 26 | after  |
| AL4054  | hospital  | cancer  | 47 | female | 29 | after  |
| AL4055  | screening | cancer  | 65 | male   | 27 | before |
| AL4056  | screening | cancer  | 63 | male   | 23 | before |
| AL4057  | screening | adenoma | 58 | female | 27 | before |
| AL4058  | screening | cancer  | 57 | male   | 21 | before |
| AL4059  | hospital  | cancer  | 86 | male   | 23 | after  |
| AL4060  | screening | cancer  | 56 | female | 28 | before |
| AL4061  | screening | adenoma | 57 | female | 25 | before |
| AL4062  | hospital  | cancer  | 75 | female | 24 | after  |

|        |           |         |    |        |    |        |
|--------|-----------|---------|----|--------|----|--------|
| AL4063 | screening | adenoma | 64 | male   | 19 | before |
| AL4064 | hospital  | cancer  | 67 | male   | 24 | after  |
| AL4065 | hospital  | cancer  | 43 | male   | 26 | after  |
| AL4066 | hospital  | cancer  | 76 | male   | 25 | after  |
| AL4067 | screening | neg     | 56 | female | 24 | before |
| AL4068 | screening | neg     | 54 | male   | 26 | before |
| AL4069 | screening | neg     | 52 | female | 30 | before |
| AL4070 | screening | neg     | 57 | female | 24 | before |
| AL4071 | screening | neg     | 52 | male   | 28 | before |
| AL4072 | screening | neg     | 58 | female | 24 | before |
| AL4073 | screening | neg     | 55 | male   | 29 | before |
| AL4074 | screening | neg     | 54 | female | 23 | before |
| AL4075 | screening | neg     | 58 | female | 23 | before |
| AL4076 | hospital  | cancer  | 45 | male   | 26 | after  |
| AL4077 | screening | adenoma | 68 | male   | 26 | before |
| AL4078 | screening | neg     | 55 | female | 25 | before |
| AL4079 | screening | neg     | 54 | female | 23 | before |
| AL4080 | screening | neg     | 57 | female | 24 | before |
| AL4081 | screening | neg     | 55 | male   | 26 | before |
| AL4082 | screening | neg     | 50 | female | 31 | before |
| AL4083 | screening | neg     | 56 | male   | 26 | before |
| AL4084 | screening | neg     | 57 | female | 23 | before |
| AL4086 | screening | neg     | 51 | female | 25 | before |
| AL4087 | screening | neg     | 60 | male   | 28 | before |
| AL4088 | screening | neg     | 54 | male   | 27 | before |
| AL4089 | screening | neg     | 56 | male   | 35 | before |
| AL4090 | screening | neg     | 63 | male   | 26 | before |
| AL4091 | screening | neg     | 51 | female | 30 | before |
| AL4092 | screening | neg     | 51 | female | 21 | before |
| AL4093 | screening | neg     | 61 | female | 24 | before |
| AL4095 | hospital  | cancer  | 85 | male   | 28 | after  |

**Table S3. Thirty-two microbial species selected by 100 times LASSO model, with FDR calculated by ALDEx2.**

| <b>Specie</b>                         | <b>1se coef</b> | <b>Times</b> | <b>MWAS</b> | <b>Pr(&gt; t ).BH</b> |
|---------------------------------------|-----------------|--------------|-------------|-----------------------|
| <i>Parvimonas micra</i>               | 0.313           | 100          | TRUE        | 9.94E-34              |
| <i>Lachnospira</i> sp000436535        | -0.017          | 100          | TRUE        | 2.26E-12              |
| <i>Faecalibacterium prausnitzii_I</i> | -0.097          | 100          | TRUE        | 1.15E-11              |
| <i>Agathobacter</i> sp000434275       | -0.038          | 100          | TRUE        | 2.94E-10              |
| <i>Lachnospira</i> sp003537285        | -0.005          | 93           | TRUE        | 2.36E-08              |
| <i>TF01-11</i> sp003529475            | -0.016          | 100          | TRUE        | 3.58E-08              |
| <i>MGYG-HGUT-03987</i>                | 0.052           | 100          | TRUE        | 4.96E-07              |
| <i>CAG-41</i> sp900066215             | -0.017          | 100          | TRUE        | 6.58E-07              |
| <i>MGYG-HGUT-00605</i>                | -0.039          | 100          | TRUE        | 8.49E-07              |
| <i>Faecalicatena torques</i>          | 0.02            | 93           | TRUE        | 8.77E-07              |
| <i>Bacteroides fragilis_A</i>         | 0.025           | 93           | TRUE        | 1.52E-06              |
| <i>MGYG-HGUT-00245</i>                | -0.037          | 100          | TRUE        | 2.05E-06              |
| <i>MGYG-HGUT-02304</i>                | -0.034          | 97           | TRUE        | 2.11E-05              |
| <i>MGYG-HGUT-03875</i>                | 0.041           | 100          | TRUE        | 2.66E-05              |
| <i>Butyrivibrio_A crossotus</i>       | -0.035          | 100          | TRUE        | 4.02E-05              |
| <i>Blautia_A</i> sp900066205          | -0.015          | 100          | TRUE        | 4.29E-05              |
| <i>Romboutsia timonensis</i>          | -0.061          | 100          | TRUE        | 1.39E-04              |
| <i>UBA11524</i> sp000437595           | -0.021          | 100          | TRUE        | 1.57E-04              |
| <i>CAG-269</i> sp000431335            | -0.044          | 100          | TRUE        | 9.48E-04              |
| <i>Sutterella wadsworthensis_A</i>    | 0.031           | 100          | TRUE        | 5.69E-03              |
| <i>Anaerotignum</i> sp000436415       | 0.02            | 100          | TRUE        | 6.02E-03              |
| <i>MGYG-HGUT-00213</i>                | -0.012          | 95           | TRUE        | 1.23E-02              |
| <i>MGYG-HGUT-00184</i>                | -0.052          | 100          | TRUE        | 1.42E-02              |
| <i>Desulfovibrio</i> sp900319575      | 0.014           | 97           | FALSE       | 0.07                  |
| <i>Streptococcus thermophilus</i>     | -0.047          | 100          | FALSE       | 0.12                  |
| <i>ER4</i> sp003522105                | 0.032           | 100          | FALSE       | 0.34                  |
| <i>MGYG-HGUT-00877</i>                | 0.069           | 100          | FALSE       | 0.62                  |
| <i>CAG-245</i> sp000435175            | -0.01           | 93           | FALSE       | 0.84                  |
| <i>Dialister invisus</i>              | 0.01            | 93           | FALSE       | 0.99                  |
| <i>Bifidobacterium bifidum</i>        | -0.015          | 97           | FALSE       | 1                     |
| <i>Allisonella histaminiformans</i>   | 0.011           | 93           | FALSE       | 1                     |
| <i>Blautia_A</i> sp000433815          | -0.042          | 97           | FALSE       | 1                     |
| <b>Age</b>                            | 0.231           |              |             |                       |
| <b>Sex</b>                            | 0.270           |              |             |                       |
| <b>BMI</b>                            | -0.090          |              |             |                       |

**Table S4: eggNOG orthologies selected by the predictive model, with effect sizes estimated by ALDEx2 in both the training and the testing datasets. P-value for the testing dataset is also shown.**

|    | Orthology | Training effect | Testing effect | Testing p-value | Annotation                                                              |
|----|-----------|-----------------|----------------|-----------------|-------------------------------------------------------------------------|
| 1  | COG5498   | -0.23           | -0.01          | 8.60E-01        | glucan endo-1,4-beta-glucanase activity, C-3 substituted reducing group |
| 2  | COG5107   | 0.14            | 0.42           | 2.00E-03        | domain of Unknown Function (DUF349)                                     |
| 3  | COG4942   | -0.01           | -0.24          | 3.90E-02        | autolysis                                                               |
| 4  | COG4887   | -0.14           | 0.03           | 8.20E-01        | protein of unknown function (DUF1847)                                   |
| 5  | COG4670   | 0.14            | 0.12           | 3.00E-01        | ketone body catabolic process                                           |
| 6  | COG3866   | 0.05            | 0.44           | 7.10E-04        | pectate lyase activity                                                  |
| 7  | COG2936   | -0.06           | -0.1           | 3.40E-01        | dipeptidyl-peptidase activity                                           |
| 8  | COG2918   | -0.12           | -0.3           | 1.60E-02        | glutamate-cysteine ligase activity                                      |
| 9  | COG2220   | -0.03           | -0.13          | 1.70E-01        | N-acetylphosphatidylethanolamine-hydrolysing phospholipase activity     |
| 10 | COG1925   | -0.25           | -0.35          | 1.40E-02        | phosphoenolpyruvate-dependent sugar phosphotransferase system           |
| 11 | COG1803   | -0.05           | -0.18          | 1.80E-01        | methylglyoxal synthase activity                                         |
| 12 | COG1678   | 0.21            | 0.32           | 1.00E-02        | ribonucleoside-diphosphate reductase activity                           |
| 13 | COG1501   | -0.11           | -0.22          | 6.90E-02        | alpha-glucosidase activity                                              |
| 14 | COG1489   | -0.07           | -0.26          | 3.80E-02        | positive regulation of transcription, DNA-templated                     |
| 15 | COG1475   | -0.12           | -0.32          | 1.70E-02        | chromosome segregation                                                  |
| 16 | COG1396   | -0.14           | -0.37          | 4.30E-03        | sequence-specific DNA binding                                           |
| 17 | COG1021   | 0.19            | -0.02          | 8.50E-01        | (2,3-dihydroxybenzoyl)adenylate synthase activity                       |
| 18 | COG0818   | 0.03            | -0.27          | 5.00E-02        | undecaprenol kinase activity                                            |
| 19 | COG0774   | 0.22            | 0.45           | 7.10E-04        | UDP-3-O-[3-hydroxymyristoyl] N-acetylglucosamine deacetylase activity   |
| 20 | COG0732   | -0.08           | -0.25          | 4.40E-02        | DNA restriction-modification system                                     |
| 21 | COG0682   | -0.08           | -0.43          | 2.00E-03        | lipoprotein biosynthetic process                                        |
| 22 | COG0631   | -0.2            | -0.5           | 5.80E-05        | protein serine/threonine phosphatase activity                           |
| 23 | COG0515   | -0.2            | -0.32          | 1.40E-02        | protein kinase activity                                                 |
| 24 | COG0491   | -0.03           | -0.37          | 3.30E-03        | hydroxyacylglutathione hydrolase activity                               |
| 25 | COG0142   | -0.04           | 0.11           | 3.40E-01        | isoprenoid biosynthetic process                                         |
| 26 | COG0140   | -0.19           | -0.27          | 3.60E-02        | phosphoribosyl-ATP diphosphatase activity                               |
| 27 | COG0003   | 0.21            | 0.16           | 2.10E-01        | ATPase activity                                                         |
| 28 | 2DSTI     | 0.14            | 0.03           | 8.40E-01        | <i>NA</i>                                                               |
| 29 | 2DMA1     | -0.15           | -0.33          | 9.30E-03        | <i>NA</i>                                                               |
| 30 | 2DBNF     | 0.41            | 0.14           | 3.30E-01        | <i>NA</i>                                                               |
| 31 | 2DBB0     | -0.22           | 0.03           | 8.60E-01        | L-2-amino-thiazoline-4-carboxylic acid hydrolase                        |
| 32 | 2CPUI     | -0.29           | -0.22          | 7.40E-02        | Stage III sporulation protein AC/AD protein family                      |
| 33 | 2BZEU     | -0.39           | -0.2           | 1.00E-01        | Psort location Cytoplasmic, score                                       |
| 34 | 2ARFE     | 0.44            | 0.17           | 1.30E-01        | Conjugative transposon protein TraO                                     |

|    |       |       |       |          |                             |
|----|-------|-------|-------|----------|-----------------------------|
| 35 | 28JU4 | 0.15  | -0.07 | 5.60E-01 | <i>NA</i>                   |
| 36 | 28HR1 | -0.14 | -0.26 | 6.90E-02 | Putative amidoligase enzyme |
